# Supplementary material for: Canonical and explicitly-correlated coupled cluster correlation energies of sub-kJ mol−1 accuracy via cost-effective hybrid-post-CBS extrapolation
Source: Royal Society of Chemistry journal article supplement (doi:10.1039/d1cp00357g), 2021-01-01
Supplement: d1cp00357g1.pdf [file d1cp00357g1.pdf]

## SUPPLEMENTARY INFORMATION

# Canonical and explicitly-correlated coupled cluster correlation energies of sub-kJ/mol accuracy via cost-effective hybrid-post-CBS extrapolation

A.J.C. Varandas<sup>\*,†,‡,¶</sup>

<sup>†</sup>*Department of Physics, Qufu Normal University, China*

<sup>‡</sup>*Department of Physics, Universidade Federal do Espírito Santo, 29075-910 Vitória, Brazil*

<sup>¶</sup>*Department of Chemistry, and Chemistry Centre, University of Coimbra, 3004-535  
Coimbra, Portugal*

E-mail: varandas@uc.pt

Table 1: Systems in TS-106

| # in TS-106 | Formula           | Name                      | # in A24 + TS-106 |
|-------------|-------------------|---------------------------|-------------------|
| 1           | CFN               | Cyanogen fluoride         | 25                |
| 2           | CFN               | Isocyanogen fluoride      | 26                |
| 3           | CF <sub>2</sub>   | Singlet difluoromethylene | 27                |
| 4           | CF <sub>2</sub> O | Carbonyl fluoride         | 28                |

Continued on next page

*continued from previous page*

| # in TS-106 | Formula                         | Name                    | # in A24 + TS-106 |
|-------------|---------------------------------|-------------------------|-------------------|
| 5           | CF <sub>4</sub>                 | Tetrafluoromethane      | 29                |
| 6           | CHF                             | Singlet fluoromethylene | 30                |
| 7           | CHFO                            | Formyl fluoride         | 31                |
| 8           | CHF <sub>3</sub>                | Trifluoromethane        | 32                |
| 9           | CHN                             | Hydrogen cyanide        | 33                |
| 10          | CHN                             | Hydrogen isocyanide     | 34                |
| 11          | CHNO                            | Cyanic acid             | 35                |
| 12          | CHNO                            | Isocyanic acid          | 36                |
| 13          | CHNO                            | Formonitrile oxide      | 37                |
| 14          | CHNO                            | Isfulminic acid         | 38                |
| 15          | CH <sub>2</sub>                 | Singlet methylene       | 39                |
| 16          | CH <sub>2</sub> F <sub>2</sub>  | Difluoromethane         | 40                |
| 17          | CH <sub>2</sub> N <sub>2</sub>  | Cyanamide               | 41                |
| 18          | CH <sub>2</sub> N <sub>2</sub>  | 3H-Diazirine            | 42                |
| 19          | CH <sub>2</sub> N <sub>2</sub>  | Diazomethane            | 43                |
| 20          | CH <sub>2</sub> O               | Formaldehyde            | 44                |
| 21          | CH <sub>2</sub> O               | Hydroxymethylene        | 45                |
| 22          | CH <sub>2</sub> O <sub>2</sub>  | Dioxirane               | 46                |
| 23          | CH <sub>2</sub> O <sub>2</sub>  | Formic acid             | 47                |
| 24          | CH <sub>2</sub> O <sub>3</sub>  | Performic acid*         | 48                |
| 25          | CH <sub>3</sub> F               | Fluoromethane           | 49                |
| 26          | CH <sub>3</sub> N               | Methanimine             | 50                |
| 27          | CH <sub>3</sub> NO              | Formamide               | 51                |
| 28          | CH <sub>3</sub> NO <sub>2</sub> | Methyl nitrite*         | 52                |

Continued on next page

*continued from previous page*

| # in TS-106 | Formula                                      | Name                 | # in A24 + TS-106 |
|-------------|----------------------------------------------|----------------------|-------------------|
| 29          | CH <sub>3</sub> NO <sub>2</sub>              | Nitromethane*        | 53                |
| 30          | CH <sub>4</sub>                              | Methane              | 54                |
| 31          | CH <sub>4</sub> N <sub>2</sub> O             | Urea*                | 55                |
| 32          | CH <sub>4</sub> O                            | Methanol             | 56                |
| 33          | CH <sub>5</sub> N                            | Methylamine*         | 57                |
| 34          | CO                                           | Carbon monoxide      | 58                |
| 35          | CO <sub>2</sub>                              | Carbon dioxide       | 59                |
| 36          | C <sub>2</sub> F <sub>2</sub>                | Diffuoroacetylene    | 60                |
| 37          | C <sub>2</sub> F <sub>4</sub>                | Tetrafluoroethylene* | 61                |
| 38          | C <sub>2</sub> HF                            | Fluoroacetylene      | 62                |
| 39          | C <sub>2</sub> HF <sub>3</sub>               | Trifluoroethylene    | 63                |
| 40          | C <sub>2</sub> H <sub>2</sub>                | Acetylene            | 64                |
| 41          | C <sub>2</sub> H <sub>2</sub> F <sub>2</sub> | 1,1-Difluoroethylene | 65                |
| 42          | C <sub>2</sub> H <sub>2</sub> O              | Ketene               | 66                |
| 43          | C <sub>2</sub> H <sub>2</sub> O              | Oxirene              | 67                |
| 44          | C <sub>2</sub> H <sub>2</sub> O <sub>2</sub> | Glyoxal              | 68                |
| 45          | C <sub>2</sub> H <sub>3</sub> F              | Fluoroethylene       | 69                |
| 46          | C <sub>2</sub> H <sub>3</sub> FO             | Acetyl fluoride*     | 70                |
| 47          | C <sub>2</sub> H <sub>3</sub> N              | Acetonitrile*        | 71                |
| 48          | C <sub>2</sub> H <sub>3</sub> N              | Methyl isocyanide*   | 72                |
| 49          | C <sub>2</sub> H <sub>4</sub>                | Ethylene             | 73                |
| 50          | C <sub>2</sub> H <sub>4</sub> O              | Acetaldehyde*        | 74                |
| 51          | C <sub>2</sub> H <sub>4</sub> O              | Oxirane*             | 75                |
| 52          | C <sub>2</sub> H <sub>4</sub> O <sub>2</sub> | Acetic acid*         | 76                |

Continued on next page

*continued from previous page*

| # in TS-106 | Formula                                      | Name              | # in A24 + TS-106 |
|-------------|----------------------------------------------|-------------------|-------------------|
| 53          | C <sub>2</sub> H <sub>4</sub> O <sub>2</sub> | Methyl formate*   | 77                |
| 54          | C <sub>2</sub> H <sub>5</sub> F              | Fluoroethane*     | 78                |
| 55          | C <sub>2</sub> H <sub>5</sub> N              | Aziridine*        | 79                |
| 56          | C <sub>2</sub> H <sub>6</sub>                | Ethane*           | 80                |
| 57          | C <sub>2</sub> H <sub>6</sub> O              | Dimethyl ether*   | 81                |
| 58          | C <sub>2</sub> H <sub>6</sub> O              | Ethanol*          | 82                |
| 59          | C <sub>2</sub> N <sub>2</sub>                | Cyanogen          | 83                |
| 60          | C <sub>3</sub> H <sub>3</sub> N              | Acrylonitrile*    | 84                |
| 61          | C <sub>3</sub> H <sub>4</sub>                | Allene*           | 85                |
| 62          | C <sub>3</sub> H <sub>4</sub>                | Cyclopropene*     | 86                |
| 63          | C <sub>3</sub> H <sub>4</sub>                | Propyne*          | 87                |
| 64          | C <sub>3</sub> H <sub>6</sub>                | Cyclopropane*     | 88                |
| 65          | C <sub>3</sub> H <sub>6</sub>                | Propene*          | 89                |
| 66          | C <sub>3</sub> H <sub>8</sub>                | Propane*          | 90                |
| 67          | C <sub>3</sub> O <sub>2</sub>                | Carbon suboxide   | 91                |
| 68          | C <sub>4</sub> H <sub>4</sub>                | Butatriene*       | 92                |
| 69          | C <sub>4</sub> H <sub>4</sub>                | Cyclobutadiene*   | 93                |
| 70          | C <sub>4</sub> H <sub>4</sub>                | Tetrahedran*      | 94                |
| 71          | C <sub>4</sub> H <sub>4</sub>                | Vinylacetylene*   | 95                |
| 72          | C <sub>4</sub> N <sub>2</sub>                | Dicyanoacetylene* | 96                |
| 73          | FH                                           | Hydrogen fluoride | 97                |
| 74          | FHO                                          | Hypofluorous acid | 98                |
| 75          | FHO <sub>2</sub>                             | Fluoroperoxide    | 99                |
| 76          | FH <sub>2</sub> N                            | Monofluoroamine   | 100               |

Continued on next page

*continued from previous page*

| # in TS-106 | Formula                         | Name                    | # in A24 + TS-106 |
|-------------|---------------------------------|-------------------------|-------------------|
| 77          | FH <sub>3</sub> N <sub>2</sub>  | Fluorohydrazine*        | 101               |
| 78          | FNO                             | Nitrosyl fluoride       | 102               |
| 79          | F <sub>2</sub>                  | Difluorine              | 103               |
| 80          | F <sub>2</sub> N <sub>2</sub>   | Difluorodiazene (cis)   | 104               |
| 81          | F <sub>2</sub> N <sub>2</sub>   | Difluorodiazene (trans) | 105               |
| 82          | F <sub>2</sub> O                | Difluorine monoxide     | 106               |
| 83          | F <sub>2</sub> O <sub>2</sub>   | Perfluoroperoxide       | 107               |
| 84          | F <sub>3</sub> N                | Trifluoroamine          | 108               |
| 85          | HNO                             | Nitrosylhydride         | 109               |
| 86          | HNO <sub>2</sub>                | Nitrous acid (cis)      | 110               |
| 87          | HNO <sub>2</sub>                | Nitrous acid (trans)    | 111               |
| 88          | HNO <sub>2</sub>                | Nitrous acid            | 112               |
| 89          | HNO <sub>3</sub>                | Nitric acid             | 113               |
| 90          | HN <sub>3</sub>                 | Hydrogen azide          | 114               |
| 91          | H <sub>2</sub> N <sub>2</sub>   | Diazene (cis)           | 115               |
| 92          | H <sub>2</sub> N <sub>2</sub>   | Diazene (trans)         | 116               |
| 93          | H <sub>2</sub> N <sub>2</sub>   | Diazene (iso)           | 117               |
| 94          | H <sub>2</sub> N <sub>2</sub> O | Nitrosamide             | 118               |
| 95          | H <sub>2</sub> O                | Water                   | 119               |
| 96          | H <sub>2</sub> O <sub>2</sub>   | Hydrogen peroxide       | 120               |
| 97          | H <sub>3</sub> N                | Ammonia                 | 121               |
| 98          | H <sub>3</sub> NO               | Ammonia oxide           | 122               |
| 99          | H <sub>3</sub> NO               | Hydroxylamine           | 123               |
| 100         | H <sub>4</sub> N <sub>2</sub>   | Hydrazine               | 124               |

Continued on next page

*continued from previous page*

| # in TS-106 | Formula                       | Name                   | # in A24 + TS-106 |
|-------------|-------------------------------|------------------------|-------------------|
| 101         | N <sub>2</sub>                | Dinitrogen             | 125               |
| 102         | N <sub>2</sub> O              | Nitrous oxide          | 126               |
| 103         | N <sub>2</sub> O <sub>3</sub> | Dinitrogen trioxide*   | 127               |
| 104         | N <sub>2</sub> O <sub>4</sub> | Dinitrogen tetraoxide* | 128               |
| 105         | O <sub>3</sub>                | Ozone                  | 129               |
| 106         | H <sub>2</sub>                | Dihydrogen             | 130               |

<sup>a</sup>Reference energy obtained at CBS(*Q*, 5) level of theory; see the text.

Table 2: CBS extrapolated PNO-LCCSD(T)/VXZ correlation energies<sup>a)</sup> for linear HCN...HCN, HF dimer, ethyne dimer (T-shaped), and Ar-methane (systems #3, #4, #12 and #20 in A24, respectively) at their optimized CCSD(T) equilibrium geometries<sup>b)</sup> and separated-monomers<sup>c)</sup> limit.

| CBS ext. pair           | HCN dimer                                              |                          |                     | HF dimer            |                          |                     |
|-------------------------|--------------------------------------------------------|--------------------------|---------------------|---------------------|--------------------------|---------------------|
|                         | $E_e^{\text{cord}}$                                    | $E_\infty^{\text{core}}$ | $D_e^{\text{corf}}$ | $E_e^{\text{cord}}$ | $E_\infty^{\text{core}}$ | $D_e^{\text{corf}}$ |
| CCSD(T)                 |                                                        |                          |                     |                     |                          |                     |
| ( <i>d, t</i> )         | -0.80230164                                            | -0.80117666              | -0.706              | -0.63737814         | -0.63613851              | -0.778              |
| ( <i>d, q</i> )         | -0.80143966                                            | -0.80039410              | -0.656              | -0.64186294         | -0.64057387              | -0.809              |
| ( <i>t, q</i> )         | -0.80108098                                            | -0.80006846              | -0.635              | -0.64407563         | -0.64241951              | -0.822              |
| ( <i>d, 5</i> )         | -0.80088421                                            | -0.79987557              | -0.633              | -0.64372915         | -0.64281505              | -0.791              |
| ( <i>t, 5</i> )         | -0.80068268                                            | -0.79969057              | -0.623              | -0.64502791         | -0.64376435              | -0.793              |
| ( <i>q, 5</i> )         | -0.80047594                                            | -0.79949443              | -0.616              | -0.64570203         | -0.64446238              | -0.778              |
| pCBS <sup>g)</sup>      | -0.80059817                                            | -0.79963014              | -0.607              | -0.64624114         | -0.64490381              | -0.839              |
| pCBS <sup>h)</sup>      | -0.8003676                                             | -0.7993702               | -0.626              | -0.6459013          | -0.6446260               | -0.800              |
| CCSD(T)-F12b            |                                                        |                          |                     |                     |                          |                     |
| ( <i>d, t</i> )         | -0.79964694                                            | -0.79866528              | -0.616              | -0.64351886         | -0.64211475              | -0.881              |
| ( <i>d, q</i> )         | -0.79855259                                            | -0.79751559              | -0.651              | -0.64377769         | -0.64236484              | -0.887              |
| ( <i>t, q</i> )         | -0.79825489                                            | -0.79720283              | -0.660              | -0.64384810         | -0.64243287              | -0.888              |
| pCBS <sup>i)</sup>      | -0.79791029                                            | -0.79684080              | -0.671              | -0.64392960         | -0.64251162              | -0.890              |
| pCBS <sup>j)</sup>      | -0.8000274                                             | -0.7989896               | -0.651              | -0.6458628          | -0.6445563               | -0.810              |
| h-pCBS( <i>dt, dt</i> ) | -0.79928143                                            | -0.79831951              | -0.604              | -0.64436433         | -0.64293757              | -0.895              |
| h-pCBS( <i>dt, tq</i> ) | -0.79841908                                            | -0.79738522              | -0.649              | -0.64400559         | -0.64258657              | -0.890              |
| CBS ext. pair           | C <sub>2</sub> H <sub>2</sub> dimer (C <sub>2v</sub> ) |                          |                     | Ar-methane          |                          |                     |
|                         | $E_e^{\text{cord}}$                                    | $E_\infty^{\text{core}}$ | $D_e^{\text{corf}}$ | $E_e^{\text{cord}}$ | $E_\infty^{\text{core}}$ | $D_e^{\text{corf}}$ |
| CCSD(T)                 |                                                        |                          |                     |                     |                          |                     |
| ( <i>d, t</i> )         | -0.73667232                                            | -0.73523741              | -0.900              | -0.51476205         | -0.51420012              | -0.353              |
| ( <i>d, q</i> )         | -0.73437935                                            | -0.73283454              | -0.969              | -0.51451643         | -0.51387710              | -0.401              |
| ( <i>t, q</i> )         | -0.73287815                                            | -0.73127895              | -1.004              | -0.51441422         | -0.51374269              | -0.421              |
| ( <i>d, 5</i> )         | -0.73342520                                            | -0.73183466              | -0.998              | -0.51342741         | -0.51259286              | -0.524              |
| ( <i>t, 5</i> )         | -0.73233868                                            | -0.73071612              | -1.018              | -0.51323764         | -0.51236433              | -0.548              |
| ( <i>q, 5</i> )         | -0.73177472                                            | -0.73013555              | -1.023              | -0.51262695         | -0.51164890              | -0.614              |
| pCBS <sup>g)</sup>      | -0.73214088                                            | -0.73048878              | -1.037              | -0.51427665         | -0.51356176              | -0.449              |
| pCBS <sup>h)</sup>      | -0.7318413                                             | -0.7301604               | -1.055              | -0.5134963          | -0.5125565               | -0.590              |
| CCSD(T)-F12b            |                                                        |                          |                     |                     |                          |                     |
| ( <i>d, t</i> )         | -0.73061866                                            | -0.72897963              | -1.028              | -0.51351496         | -0.51313920              | -0.236              |
| ( <i>d, q</i> )         | -0.72932376                                            | -0.72771873              | -1.007              | -0.51271739         | -0.51183231              | -0.555              |
| ( <i>t, q</i> )         | -0.72897150                                            | -0.72737572              | -1.001              | -0.51250042         | -0.51147679              | -0.642              |
| pCBS <sup>i)</sup>      | -0.72856375                                            | -0.72697867              | -0.995              | -0.51224927         | -0.51106526              | -0.743              |
| pCBS <sup>j)</sup>      | -0.7311028                                             | -0.7295164               | -0.996              | -0.5148490          | -0.5138796               | -0.608              |
| h-pCBS( <i>dt, dt</i> ) | -0.72978518                                            | -0.72811804              | -1.046              | -0.51334326         | -0.51299313              | -0.220              |
| h-pCBS( <i>dt, tq</i> ) | -0.72906207                                            | -0.72745098              | -1.011              | -0.51264458         | -0.51174799              | -0.563              |

<sup>a)</sup>Energies in hartree (E<sub>h</sub>), except for  $D_e^{\text{cor}}$  that are in kcal mol<sup>-1</sup>. <sup>b)</sup>Ref. 1 <sup>c)</sup>Separated monomers. <sup>d)</sup>Correlation energy at equilibrium. <sup>e)</sup>Correlation energy for separated monomers. <sup>f)</sup>Dissociation energy. <sup>g)</sup>Using only PNO-LCCSD(T) energies. <sup>h)</sup>See this work, Table 2. <sup>i)</sup>Using only PNO-LCCSD(T)-F12b energies.

## References

- (1) A. J. C. Varandas, *Phys. Chem. Chem. Phys.* (submitted for publication), 0 (2020).
